# Supplementary material for: Agent-based model of angiogenesis simulates capillary sprout initiation in multicellular networks
Source: Royal Society of Chemistry journal article supplement (doi:10.1039/c5ib00024f), 2015-01-01
Supplement: c5ib00024f1.pdf [file c5ib00024f1.pdf]

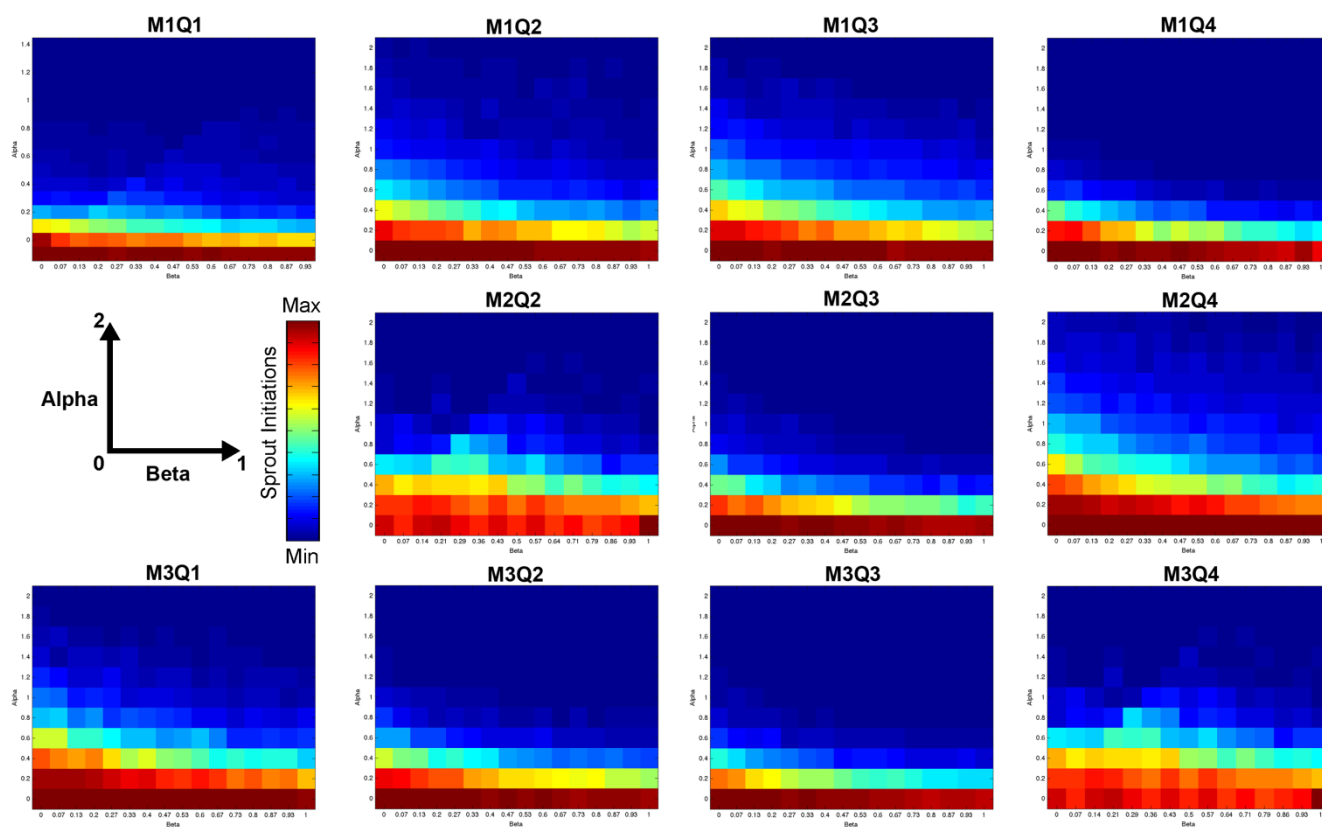

Figure S1: Bidirectional sensitivity analysis demonstrates limited sensitivity to the tip cell activation threshold. Over the tested range of parameter values the Sprout Initiations per movie were highly sensitive to changes in the Notch Transfer Coefficient ( $\alpha$ , y-axis) while being relatively insensitive to changes in the tip cell activation threshold ( $\beta$ , x-axis).
